# Supplementary material for: Effect of Pegylated-interferon (Peg-inf) Plus Ribavirin (Rbv) Therapy on Haematological Profile of Different Age Groups Infected by Hepatitis C Virus in Pakistan
Source: Research Square preprint supplement (doi:10.21203/rs.3.rs-5717094/v1), 2025-01-13
Supplement: Supplementary file 1 [file d60589da44480b3621ca93d4.xlsx]

## Sheet: Sheet1
Patient No	WBC Week 1	WBC Week 24	RBC Week 1	RBC Week 24	HB Week 1	HB Week 24	PLT Week 1	PLT Week 24
1	7200	3400	4.08	2.6	14.8	10.2	160000	120000
2	10300	4800	5.3	4.54	16.3	16.3	240000	214000
3	3900	3800	4.24	3.75	13.1	11.6	140000	150000
4	5800	5600	4.08	3.81	12.8	12.3	234000	120000
5	1300	1200	3.88	3.01	11.8	11.5	321000	130000
6	1500	1300	4.52	4.94	13.8	13.4	221000	114000
7	5300	5100	4.3	3.7	10.3	11	372000	220000
8	4700	4500	3.31	3.12	11.6	11.1	390000	340000			whole data
9	6000	5700	5.29	5.28	13.8	13.4	319000	80000
10	6100	5800	4.65	3.24	12.4	12.1	160000	130000
11	8400	6700	5.61	5.38	13.1	8.7	144000	90000
12	8900	6700	5.48	5.13	14.1	13.9	202000	131000
13	6400	5700	4.2	3.71	11.5	10	149000	100000
14	5600	4900	4.13	3.63	13.4	11.9	142000	90000
15	6300	5600	3.2	2.73	14.2	12.7	152000	101000
16	7600	6900	3.41	3	11.5	10.2	148000	90000
17	5300	4600	3.73	3.23	13.9	12.4	190000	120000
18	5800	5100	4.2	3.72	13.7	12.2	191000	130000
19	6300	5600	4.19	3.7	13.5	12	199000	110100
20	8900	8200	4.02	3.5	13.3	11.8	330000	180000
21	7200	6500	4.09	4.4	12.1	10.6	259000	160000
22	4800	4100	3.11	2.6	12.4	10.9	190000	160000
23	6300	5600	3.24	3.74	11.4	9.8	145000	120000
24	6800	6100	3.56	3.06	11.6	10.1	170000	110000
25	6000	5300	3.1	2.61	11.3	9.8	160000	110000
26	9500	8800	3.57	3.07	11.8	10.3	180000	120000
27	7100	6400	3.66	3.16	14.9	12.4	145000	110000
28	7400	6700	3.78	3.28	12.4	10.9	160000	110000
29	7800	7100	3.56	3.17	13.2	11.7	270000	120000
30	5400	4700	3.9	3.19	15.3	13.8	160000	110000
31	5300	4600	4.73	4.22	14.3	12.8	159000	90000
32	8000	7300	4.78	4.29	12.3	11.7	290000	240000
33	8700	8000	4.1	2.58	14.1	12.6	180000	130000
34	8200	7500	4.4	3.92	12.7	11.2	199000	140000
35	5300	4600	4.32	3.82	12.9	11.3	250000	200000
36	5500	4800	5.1	4.58	11.9	10.4	180000	130000
37	11100	10400	3.71	3.22	11.9	10.4	290000	240000
38	8500	7800	3.59	3.1	13.5	12	180000	130000
39	10000	9300	3.6	3.09	12.3	10.8	130000	100000
40	5700	5000	3.88	3.39	11.7	10.2	250000	100000
41	5000	6300	3.59	3.1	15.5	14	299000	140000
42	8400	7700	3.55	3.09	14.7	13.2	130000	80900
43	6300	5600	4.2	3.68	17.7	16.2	270000	220000
44	5100	4400	3.88	3.36	13.8	12.3	210000	140000
45	3900	3500	4.67	4.19	13.9	12.4	280000	230000
46	8200	7500	4.98	4.47	12.7	11.2	260000	210000
47	8900	8200	4.39	3.91	12.5	11	170000	120000
48	6000	5300	3.65	3.15	11.8	10.7	159000	80000
49	7200	6500	3.67	3.17	12.1	11.2	130000	89000
50	7400	6700	3.81	3.31	11.3	11.2	170000	120000
51	6000	5300	3.73	3.24	14.3	13.4	140000	90100
52	7600	6900	4	3.48	15.1	14.1	190000	140000
53	10700	10000	4.59	4.18	13.5	12.4	230000	180000
54	10100	9400	4.71	4.2	13.6	12.5	260000	210000
55	9300	8600	4.56	4.06	15.2	14.3	160000	110000
56	8200	7500	5.11	4.61	16	15.1	180000	130000
57	8500	7300	5.78	5.28	11	10.2	220000	170000
58	8000	7300	5.35	4.85	15.3	14.2	145000	100000
59	10300	9600	5.11	4.6	12.3	11.5	150000	100000
60	4700	4000	3.11	2.87	12.2	11.1	149000	100700
61	8100	6300	5.78	4.75	15.8	12.8	227000	100000
62	6300	3200	4.85	4.54	14.7	14	138000	89000
63	5300	5100	5.54	5.1	12	11.2	450000	246000
64	6200	4200	6.02	5.76	17.1	16.5	339000	224000
65	4300	3900	4.88	4.52	13	12.2	160000	112000
66	7800	6900	4.9	3.73	14.7	11.7	166000	154000
67	5500	4800	5.32	4.82	14.1	13	230000	180000
68	6500	5900	4.8	4.28	13.5	12.6	310000	260000
69	9000	8300	4.7	4.21	12.3	11.4	420000	280000
70	9700	9000	3.8	3.33	15	14.1	155000	100000
71	6900	6200	3.9	3.42	12.6	12.7	190000	140000
72	7500	6800	5.11	4.61	13.1	12.2	160000	111000
73	5800	5100	3.99	3.48	13.7	13.8	170000	120000
74	4500	3800	4.88	4.35	13.4	13.5	155000	100000
75	11000	10300	4.58	4.08	12.6	12.7	149000	101000
76	10000	9200	4.6	4.09	16.3	15.4	131000	83000
77	6700	6100	5.2	4.71	13.2	12.2	160000	100000
78	5800	5000	4.33	3.77	12.3	11.2	130000	80000
79	5100	4400	3.51	3.13	11.2	10.3	170000	120000
80	7800	7100	5.7	5.18	13.9	12.8	210000	160000
81	4900	4200	5.99	5.49	10.2	9.3	230000	180000
82	8200	7500	4.3	3.8	10.1	9	220000	170000
83	4900	4200	4.67	4.17	11.2	10.3	250000	200000
84	8300	7600	4.89	4.39	13.3	12.2	230000	180300
85	5800	5200	3.79	3.27	13.2	12.3	177000	120000
86	5500	4800	5.76	5.25	17.3	17.2	210000	160000
87	6700	6000	5.11	4.6	12.3	12.4	180000	130000
88	6300	5600	4.22	3.72	11.5	11.4	280000	230000
89	6400	5700	3.6	3.14	13.1	13.2	290000	240000
90	7100	6400	2.99	2.72	12.5	12.4	310000	260000
91	7400	6700	3.9	2.41	13	12.1	140000	90000
92	8500	7800	5.7	5.2	13.2	12.1	230000	180000
93	6900	6200	4.78	4.28	14.5	13.6	310000	260000
94	5400	4700	5.13	4.63	16	15.1	280000	230000
95	4900	40200	4.12	3.61	11.2	10.1	190000	140000
96	7600	6900	4.29	4	11.9	11	150000	100000
97	8500	7800	3.96	3.46	11.5	10.4	140000	99000
98	9800	9100	3.51	3	16.8	13.8	139000	110000
99	10900	10200	3.29	2.8	16.5	13.9	111000	100000
100	11000	10300	3.8	3.31	14.5	12.9	210000	150000
101	10900	10200	3.21	2.69	14.3	13	233000	170000
102	6100	8600	4.8	4.61	13.4	13.1	150000	149000
103	12700	5300	3.43	3.6	11.4	9.7	477000	290000
104	11900	6500	5.93	5.58	19.9	18.1	106000	90000
105	8100	7500	2.61	2.76	8.6	8.5	350000	110000
106	8400	6900	2.69	2.67	8.4	8.4	910000	182000
107	5700	5300	3.97	3.45	13.4	11.1	53000	108000
108	3100	2900	4.31	4.15	10.6	10.5	136000	131000
109	56000	43000	3.5	3.2	11	10.1	140000	100000
110	6700	5900	5.6	5.1	18	17.1	190000	143000
111	8000	7300	4.11	3.6	10.6	9.7	180000	120000
112	8000	7400	4.1	3.62	15.3	14.4	188000	130000
113	7900	6200	4.8	4.3	11.9	10.9	162000	110000
114	4800	4100	4.3	3.79	14.5	13.4	177000	120000
115	6000	5300	4.6	4.09	10	9.1	193000	140100
116	10000	9300	3.88	3.33	15.1	14.1	171000	120000
117	11500	10800	3.9	3.41	13.3	12.3	189000	130000
118	7100	6400	4.79	4.29	13.1	11.7	211000	150000
119	8300	7600	3.89	3.4	14.6	13.1	130000	90000
120	7800	7100	3.5	2.99	14.3	12.8	137000	89000
121	8500	7800	3.49	3	14.1	12.6	133000	110000
122	5700	5000	4.99	4.51	11.8	10.2	188000	128000
123	6900	6200	3.26	2.76	12.6	11.1	130000	101000
124	10000	9300	3.22	2.79	13.9	12.4	220000	170000
125	8200	7500	3.7	3.2	13.2	11.7	290000	250000
126	5600	4900	3.9	3.4	12.5	11	139000	111000
127	5400	4700	3.69	3.19	12.5	11.2	320000	100000
128	7200	6500	3.77	3.27	16.3	15.8	157000	103000
129	4000	3500	5.1	4.58	14.1	13	190000	140000
130	5300	4600	5.67	5.18	15	14.1	150000	100000
131	10300	9600	4.87	4.36	16.3	15.2	165000	110000
132	9200	8500	4.35	3.64	11.9	11	220000	187000
133	10400	9700	4.55	4.05	13.6	12.5	150000	112000
134	8100	7400	4.99	4.49	14.5	13.6	170000	120000
135	10300	9600	4.89	4.38	14	13.1	190000	140000
136	10800	10100	3.59	3.09	12.5	11.4	215000	160000
137	6500	5800	3.12	3	11.9	10.8	195000	140000
138	7200	6500	3.29	3.19	12.1	11.2	210000	160000
139	6900	6200	3.51	3	13.1	13.2	170000	120000
140	7800	7100	3.21	2.65	14.2	13.1	130000	90000
141	6500	5800	3.54	3.29	15.9	14	158000	100000
142	6000	5300	3.62	3.12	11.9	10.8	280000	230000
143	7400	6700	3.59	3.07	13.1	12.2	290000	240000
144	5900	5200	4.77	4.25	16.5	15.4	220000	170000
145	8000	7300	4.25	3.75	14.3	13.4	240000	190000
146	9800	9100	4.5	3.98	14.1	13.1	250000	190000
147	4800	4100	4.2	3.28	12.3	10.8	180000	130000
148	6600	5900	3.51	3.01	16	14.5	150000	100000
149	6800	6100	3.49	2.02	12.4	10.9	400000	350000
150	7100	6400	3.47	2.97	14	12.5	420000	340000
151	5000	4300	5.13	4.62	12.1	11.2	190000	140000
152	7200	6500	5.18	4.68	12.6	11.5	150000	100000
153	8700	8000	5.67	5.19	14.1	13.2	170000	120000
154	4800	4100	5.98	5.46	15	14.1	190000	140000
155	6900	6200	5.28	4.72	14.2	13.3	210000	160000
156	8600	7900	5.34	4.66	13.3	12.2	140000	100000
157	7700	7100	4.49	4.19	12.65	11.65	220000	170000
158	6200	5400	4.95	4.45	15.25	14.3	295000	240000
159	6700	5900	5.14	4.64	10.3	9.1	205000	170000
160	6600	5800	4.5	4	10.65	9.6	195000	185000
161	7100	6400	4.34	3.83	13.25	12.4	200000	150000
162	4600	4100	5.38	4.87	14.5	13.5	170000	130000
163	7200	6300	5.31	4.63	15.5	13.4	182000	101000
164	5800	4200	5.19	4.83	13.3	12.6	294000	194000
165	5700	4700	5.78	5.43	14.5	13.4	394000	358000
166	8700	4100	5.69	3.57	15.5	13.2	200000	170000
167	7100	4300	4.77	4.14	14.7	13.9	227000	182000
168	4000	4700	4.16	3.78	12.9	11.9	187000	140000
169	5600	5200	4.2	4	12.8	12.4	271000	122000
170	3300	3200	4.42	4.32	12	12.2	296000	167000
171	4800	4500	4.54	4.11	11.6	11.6	266000	180000
172	5700	5400	4.9	4.24	13.8	12.9	163000	137000
173	6200	5700	4.2	3.43	13.1	11.4	278000	247000
174	5400	5100	4.3	3.6	12.3	10.8	261000	180000
175	10000	8000	4.5	3.93	14.5	12.7	330000	280000
176	7600	6000	3.93	3.4	13.1	10.8	290000	180000
177	4800	4200	4.53	3.9	13.4	11.2	174000	110000
178	7500	7000	5.14	4.87	13.7	13.2	176000	140000
179	94200	70100	4.2	3.8	12.4	11.4	313000	219000
180	10000	7200	4.27	4.17	14.2	13.3	228000	100000
181	8200	3900	2.65	2.71	8.5	8.45	630000	146000
182	4400	65000	4.24	3.8	12	10.8	945000	119000
183	82000	6600	3.9	3.67	10.8	10.3	138000	70000
184	7300	6000	4.85	3.95	14	13.2	185000	131000
185	6700	3600	4.71	4.21	12.3	11.3	205000	150000
186	3500	8700	5.1	4.55	13.8	12.6	270000	220000
187	9300	6000	4.2	3.77	13.6	12.7	285000	145000
188	7200	4400	4.5	4	12.8	12.4	176000	125000
189	5100	7000	4.4	3.4	13.6	12.9	162000	115000
190	7800	8300	4.73	4.21	12.7	11.7	152000	107000
191	9000	5200	4.35	3.85	15.8	13.8	159000	106000
192	6300	4700	4.55	4	13.2	12.2	135000	115000
193	5400	4700	4.35	3.82	12.1	10.2	185000	130000
194	10700	10100	3.89	3.26	14.2	13.2	180000	125000
195	11100	8400	4.55	4.06	13.2	12.2	174000	75000
196	5400	4700	3.92	3.45	11.7	10.5	150000	100000
197	6300	5600	5.84	5.33	12	10.9	220000	179000
198	6500	5800	5.14	4.64	10.1	9.1	225000	175000
199	8500	7800	4.78	4.28	12.2	10.2	234000	203000
200	4900	4300	4.44	3.92	13.6	12.7	178000	125000
SUM	808600	692200	870.75	771.56	2655.4	2432.2	43406000	29477200
difference		14.39		11.39		8.4		32
Average	8161.5	7232.5	4.35375	3.8578	13.277	12.161	217030	147386
SD	9005.65	7261.37	0.752145	0.752917	1.73608	1.69301	104156	55631.5

## Sheet: Sheet2
Patient No	WBC1	WBC 2	RBC1	RBC2	HB1	HB2	PLT1	PLT2							Normal Data/Baseline data
1	7200	3400	4.08	2.6	14.1	13.2	160000	120000
2	10300	4800	5.3	4.54	15	14.1	240000	214000							WBC=4000-11000 micro L
3	3900	3800	4.24	3.75	14.2	13.3	140000	150000							RBC= 3.5-3.6 million micro L
4	5800	5600	4.08	3.81	13.3	12.2	234000	120000							HB= 11-18 g/d L
5	1300	1200	3.88	3.01	12.65	11.65	321000	130000							Platelets= 140000-400000/micro L
6	1500	1300	4.52	4.94	15.25	14.3	221000	114000
7	5300	5100	4.3	3.7	10.3	9.1	372000	220000				AGE GROUPS	GENDER
8	4700	4500	3.31	3.12	10.65	9.6	390000	340000					MALE	FEMALE
9	6000	5700	5.29	5.28	13.25	12.4	319000	80000				Below 16 years	15	12	from sno.1 to sno. 27
10	6100	5800	4.65	3.24	14.5	13.5	160000	130000				17-25 years	33	36
11	8400	6700	5.61	5.38	15.5	13.4	144000	90000				26-34	28	29
12	8900	6700	5.48	5.13	13.3	12.6	202000	131000				35 & Above	24	23
13	6400	5700	4.2	3.71	14.5	13.4	149000	100000				TOTAL	100	100
14	5600	4900	4.13	3.63	15.5	13.2	142000	90000
15	6300	5600	3.2	2.73	14.7	13.9	152000	101000
16	7600	6900	3.41	3	12.9	11.9	187000	140000
17	5300	4600	3.73	3.23	12.8	12.4	271000	122000
18	5800	5100	4.2	3.72	12	12.2	296000	257000
19	6300	5600	4.19	3.7	11.6	11.6	266000	180000
20	8900	8200	4.02	3.5	13.8	12.9	163000	137000
21	7200	6500	4.09	4.4	13.1	11.4	278000	247000
22	4800	4100	3.11	2.6	12.3	10.8	261000	180000
23	6300	5600	3.24	3.74	14.5	12.7	330000	310000
24	6800	6100	3.56	3.06	13.1	10.8	290000	280000
25	6000	5300	3.1	2.61	13.4	11.2	160000	110000
26	9500	8800	3.57	3.07	13.7	13.2	180000	120000
27	7100	6400	3.66	3.16	12.4	11.4	145000	110000
SUM	169300	144000	110.15	98.36	362.3	332.35	6173000	4323000
Differnce		14.94		10.7		8.2		29.96
Average	6270.37	5333.33	4.07963	3.64296	13.4185	12.3093	228630	160111
SD	2058.53	1676.31	0.712134	0.819305	1.35122	1.296	76897.1	71764.8
		13.94 put

## Sheet: Sheet3
28	7400	5100	3.78	3.28	12.4	10.9	160000	110000						Normal Data/Baseline data
29	7800	7900	3.56	3.17	13.2	11.7	270000	120000
30	5400	4700	3.9	3.19	15.3	13.8	160000	110000						WBC=4000-11000 micro L
31	5300	4600	4.73	4.22	14.3	12.8	159000	90000						RBC= 3.5-3.6 million micro L
32	8000	6400	4.78	4.29	12.3	11.7	290000	240000						HB= 11-18 g/d L
33	8700	5100	4.1	2.58	14.1	12.6	180000	130000						Platelets= 140000-400000/micro L
34	8200	7200	4.4	3.92	12.7	11.2	199000	140000
35	5300	4600	4.32	3.82	12.9	11.3	250000	200000
36	5500	4300	5.1	4.58	11.9	10.4	180000	130000			AGE GROUPS	GENDER
37	11100	9000	3.71	3.22	11.9	10.4	290000	240000				MALE	FEMALE
38	8500	6500	3.59	3.1	13.5	12	180000	130000			Below 16 years	15	12
39	10000	9300	3.6	3.09	12.3	10.8	130000	100000			17-25 years	33	36	from sno. 28 to 96
40	5700	5000	3.88	3.39	11.7	10.2	250000	100000			26-34	28	29
41	5000	6300	3.59	3.1	15.5	14	299000	140000			35 & Above	24	23
42	8400	6000	3.55	3.09	14.7	13.2	130000	80900			TOTAL	100	100
43	6300	5600	4.2	3.68	17.7	16.2	270000	220000
44	5100	4400	3.88	3.36	13.8	12.3	210000	140000
45	3900	3500	4.67	4.19	13.9	12.4	280000	230000
46	8200	7500	4.98	4.47	12.7	11.2	260000	210000
47	8900	8200	4.39	3.91	12.5	11	170000	120000
48	6000	5300	3.65	3.15	11.8	10.7	159000	80000
49	7200	6500	3.67	3.17	12.1	11.2	130000	89000
50	7400	6700	3.81	3.31	11.3	11.2	170000	120000
51	6000	5300	3.73	3.24	14.3	13.4	140000	90100
52	7600	6900	4	3.48	15.1	14.1	190000	140000
53	10700	10000	4.59	4.18	13.5	12.4	230000	180000
54	10100	9400	4.71	4.2	13.6	12.5	260000	210000
55	9300	8600	4.56	4.06	15.2	14.3	160000	110000
56	8200	7500	5.11	4.61	16	15.1	180000	130000
57	8500	7300	5.78	5.28	11	10.2	220000	170000
58	8000	7300	5.35	4.85	15.3	14.2	145000	100000
59	10300	9600	5.11	4.6	12.3	11.5	150000	100000
60	4700	4000	3.11	2.87	12.2	11.1	149000	100700
61	8100	6300	5.78	4.75	15.8	12.8	227000	100000
62	6300	3200	4.85	4.54	14.7	14	138000	89000
63	5300	5100	5.54	5.1	12	11.2	450000	246000
64	6200	4200	6.02	5.76	17.1	16.5	339000	224000
65	4300	3900	4.88	4.52	13	12.2	160000	112000
66	7800	6900	4.9	3.73	14.7	11.7	166000	154000
67	5500	4800	5.32	4.82	14.1	13	230000	180000
68	6500	5900	4.8	4.28	13.5	12.6	310000	260000
69	9000	8300	4.7	4.21	12.3	11.4	420000	280000
70	9700	5400	3.8	3.33	15	14.1	155000	100000
71	6900	3800	3.9	3.42	12.6	12.7	190000	140000
72	7500	6800	5.11	4.61	13.1	12.2	160000	111000
73	5800	5100	3.99	3.48	13.7	13.8	170000	120000
74	4500	3800	4.88	4.35	13.4	13.5	155000	100000
75	11000	10300	4.58	4.08	12.6	12.7	149000	101000
76	10000	9200	4.6	4.09	16.3	15.4	131000	83000
77	6700	6100	5.2	4.71	13.2	12.2	160000	100000
78	5800	3900	4.33	3.77	12.3	11.2	130000	80000
79	5100	3900	3.51	3.13	11.2	10.3	170000	120000
80	7800	7100	5.7	5.18	13.9	12.8	210000	160000
81	4900	4200	5.99	5.49	10.2	9.3	230000	180000
82	8200	7500	4.3	3.8	10.1	9	220000	170000
83	4900	4200	4.67	4.17	11.2	10.3	250000	200000
84	8300	4100	4.89	4.39	13.3	12.2	230000	180300
85	5800	5200	3.79	3.27	13.2	12.3	177000	120000
86	5500	4800	5.76	5.25	17.3	17.2	210000	160000
87	6700	6000	5.11	4.6	12.3	12.4	180000	130000
88	6300	5600	4.22	3.72	11.5	11.4	280000	230000
89	6400	5700	3	3.14	13.1	13.2	290000	240000
90	7100	6400	2.99	2.72	12.5	12.4	310000	260000
91	7400	6700	3.9	2.41	13	12.1	140000	90000
92	8500	5000	5.7	5.2	13.2	12.1	230000	180000
93	6900	6200	4.78	4.28	14.5	13.6	310000	260000
94	5400	4700	5.13	4.63	16	15.1	280000	230000
95	4300	5400	4.12	3.61	11.2	10.1	190000	140000
96	7600	6900	4.29	4	11.9	11	150000	100000
SUM	490700	418200	308.92	273.19	922	852	14497000	10331000
Difference		14.77		11.56		7.5		28.7
Average	7111.59	6060.87	4.4771	3.95928	13.3623	12.3478	210101	149725
SD	1787.42	1737.24	0.749361	0.757392	1.64845	1.65526	68259.9	56152.5

## Sheet: Sheet4
97	8500	7800	3.96	3.46	11.5	10.4	140000	110000
98	9800	9100	3.51	3	16.8	13.8	139000	90000
99	10900	10200	3.29	2.8	16.5	13.9	111000	100000
100	11000	10300	3.8	3.31	14.5	12.9	210000	150000
101	10900	10200	3.21	2.69	14.3	13	233000	170000
102	6100	8600	4.8	4.61	13.4	13.1	150000	149000
103	12700	5300	3.43	3.6	11.4	9.7	380000	290000
104	11900	6500	5.93	5.58	15.6	12.3	106000	90000
105	8100	7500	2.61	2.76	8.6	8.5	350000	110000				AGE GROUPS	GENDER		Normal Data/Baseline data
106	8400	6900	2.69	2.67	8.4	8.4	390000	270000					MALE	FEMALE
107	5700	5300	3.97	3.45	13.4	11.1	53000	108000				Below 16 years	15	12	WBC=4000-11000 micro L
108	3100	2900	4.31	4.15	10.6	10.5	136000	131000				17-25 years	33	36	RBC= 3.5-3.6 million micro L
109	5600	4300	3.5	3.2	11	10.1	140000	100000		from sno.97 to 152		26-34	28	29	HB= 11-18 g/d L
110	6700	5900	5.6	5.1	18	17.1	190000	143000				35 & Above	24	23	Platelets= 140000-400000/micro L
111	8000	7300	4.11	3.6	10.6	9.7	180000	120000				TOTAL	100	100
112	8000	7400	4.1	3.62	15.3	14.4	188000	130000
113	7900	6200	4.8	4.3	11.9	10.9	162000	110000
114	4800	4100	4.3	3.79	14.5	13.4	177000	120000
115	6000	5300	4.6	4.09	10	9.1	193000	140100
116	10000	9300	3.88	3.33	15.1	14.1	171000	120000
117	11500	10800	3.9	3.41	13.3	12.3	189000	130000
118	7100	6400	4.79	4.29	13.1	11.7	211000	150000
119	8300	7600	3.89	3.4	14.6	13.1	130000	90000
120	7800	7100	3.5	2.99	14.3	12.8	137000	89000
121	8500	7800	3.49	3	14.1	12.6	133000	110000
122	5700	5000	4.99	4.51	11.8	10.2	188000	128000
123	6900	6200	3.26	2.76	12.6	11.1	130000	101000
124	10000	9300	3.22	2.79	13.9	12.4	220000	170000
125	8200	7500	3.7	3.2	13.2	11.7	290000	250000
126	5600	4900	3.9	3.4	12.5	11	139000	111000
127	5400	4700	3.69	3.19	12.5	11.2	320000	100000
128	7200	6500	3.77	3.27	16.3	15.8	157000	103000
129	4000	3500	3.1	3.58	14.1	13	190000	140000
130	5300	4600	3.67	3.18	15	14.1	150000	100000
131	10300	9600	3.87	3.36	16.3	15.2	165000	110000
132	9200	8500	4.35	3.64	11.9	11	220000	187000
133	10400	9700	3.55	3.05	13.6	12.5	150000	112000
134	8100	7400	2.99	2.49	14.5	13.6	170000	120000
135	10300	9600	4.89	4.38	14	13.1	190000	140000
136	10800	10100	3.59	3.09	12.5	11.4	215000	160000
137	6500	5800	3.12	3	11.9	10.8	195000	140000
138	7200	6500	3.29	3.19	12.1	11.2	210000	160000
139	6900	6200	3.51	3	13.1	13.2	170000	120000
140	7800	7100	3.21	2.65	14.2	13.1	130000	90000
141	6500	5800	3.54	3.29	15.9	14	158000	100000
142	6000	5300	3.62	3.12	11.9	10.8	280000	230000
143	7400	6700	3.59	3.07	13.1	12.2	290000	240000
144	5900	5200	4.77	4.25	16.5	15.4	220000	170000
145	8000	7300	4.25	3.75	14.3	13.4	240000	190000
146	9800	9100	4.5	3.98	14.1	13.1	250000	190000
147	4800	4100	4.2	3.28	12.3	10.8	180000	130000
148	6600	5900	3.51	3.01	16	14.5	150000	100000
149	6800	6100	3.49	2.02	12.4	10.9	350000	250000
150	7100	6400	3.47	2.97	14	12.5	290000	210000
151	5000	4300	3.13	2.62	12.1	11.2	190000	140000
152	7200	6500	3.18	2.68	12.6	11.5	150000	100000
SUM	434200	385500	214.89	189.97	752	684.8	10946000	7912100
Difference		11.21		11.59		8.9		27.71
Average	15235.1	13526.3	7.54	6.66561	26.386	24.0281	384070	277618
SD	2134.31	1939.61	0.672911	0.665107	1.98208	1.80199	69841.4	49335.8

## Sheet: Sheet5
153	8700	8000	5.67	5.19	14.8	10.2	170000	120000
154	4800	4100	5.98	5.46	16.3	16.3	190000	140000
155	6900	6200	5.28	4.72	13.1	11.6	210000	160000
156	8600	7900	5.34	5.2	12.8	12.3	140000	100000
157	7700	7100	4.49	4.19	11.8	11.5	220000	218000
158	6200	6000	4.95	4.45	13.8	13.4	295000	240000
159	6700	5900	5.14	4.64	10.3	11	205000	170000				AGE GROUPS	GENDER			Normal Data/Baseline data
160	6600	5800	4.5	4	11.6	11.1	195000	185000					MALE	FEMALE
161	7100	6400	4.34	4.13	13.8	13.4	200000	150000				Below 16 years	15	12		WBC=4000-11000 micro L
162	4600	4100	5.38	4.87	12.4	12.1	170000	130000				17-25 years	33	36		RBC= 3.5-3.6 million micro L
163	7200	6300	5.31	4.63	13.1	8.7	182000	150000				26-34	28	29		HB= 11-18 g/d L
164	5800	4200	5.19	4.83	14.1	13.9	294000	194000		from 152 to 200		35 & Above	24	23		Platelets= 140000-400000/micro L
165	5700	4700	5.78	4.43	11.5	10	394000	358000				TOTAL	100	100
166	8700	6400	3.69	3.57	13.4	11.9	200000	170000
167	7100	6100	4.77	4.14	14.2	12.7	227000	182000
168	4000	4700	4.16	3.78	11.5	10.2	148000	90000
169	5600	4400	4.5	4	13.9	12.4	190000	120000
170	4700	4100	4.42	4.32	13.7	12.2	191000	130000
171	4800	3800	4.54	4.11	13.5	12	199000	110100
172	5700	5400	5.9	4.24	13.3	11.8	330000	180000
173	6200	5000	4.2	3.43	12.1	10.6	259000	160000
174	5400	4000	4.3	3.6	12.4	10.9	190000	160000
175	10000	9200	4.5	3.93	11.4	9.8	145000	120000
176	7600	6300	3.93	3.4	11.6	10.1	170000	110000
177	5700	4200	4.53	3.9	11.3	9.8	174000	110000
178	8700	7500	5.14	4.19	11.8	10.3	176000	140000
179	3700	2800	4.2	3.8	14.9	12.4	379000	300000
180	11000	9700	4.27	3.4	14.2	13.3	228000	100000
181	8200	7000	3.65	2.71	8.5	8.45	630000	310000
182	5600	4100	4.24	3.13	12	10.8	945000	119000
183	8000	7600	3.9	3.67	10.8	10.3	138000	70000
184	7300	6000	4.85	3.95	14	13.2	185000	131000
185	5700	3600	4.71	4.21	12.3	11.3	205000	150000
186	9600	8700	5.1	4.55	13.8	13.2	270000	220000
187	10500	9500	4.2	3.77	13.6	12.7	285000	145000
188	7000	6700	4.5	4	12.8	12.4	279000	260000
189	5100	5900	4.4	3.4	13.6	12.9	162000	115000
190	8900	6100	5.73	4.21	12.7	11.7	152000	139000
191	9000	7800	4.35	3.85	15.8	13.8	159000	106000
192	7900	4700	4.55	4	13.2	12.2	135000	115000
193	5400	4700	4.35	4.11	12.1	10.2	185000	130000
194	10700	10100	3.89	3.26	14.2	13.2	280000	260000
195	6000	7100	4.55	4.06	13.2	12.2	174000	75000
196	5400	4100	3.92	3.3	11.7	10.5	150000	100000
197	7900	6500	7.84	5.33	12	10.9	220000	179000
198	6500	5800	5.14	4.64	10.1	9.1	225000	200000
199	10900	9200	4.78	4.98	12.2	11.5	297000	210000
200	4900	4300	4.44	3.92	13.6	12.7	178000	150000
SUM	336000	289800	227.49	197.6	614.8	559.15	11325000	7681100
Difference		13.75		13.13		9.05		32.17
Average	7000	6037.5	4.73937	4.11667	12.8083	11.649	235938	160023
SD	1890.85	1809.39	0.741216	0.598286	1.4595	1.51726	134855	61775.7
